# Supplementary material for: mRNA knockdown by single strand RNA is improved by chemical modifications
Source: PubMed Central journal article supplement — Nucleic Acids Res. 2012 Jan 16;40(9):4125–36. doi: 10.1093/nar/gkr1301 (PMC3351186; doi:10.1093/nar/gkr1301), 2012-01-16
Supplement: supp_gkr1301_nar-02811-c-2011-File008.pdf [file supp_gkr1301_nar-02811-c-2011-File008.pdf]

## SUPPLEMENTAL MATERIAL

**Figure S1:** Comparison of purine (R) versus pyrimidine (Y) 2' modifications in the absence of 5' phosphorylation of the guide strand. In vitro cell-based evaluation of mRNA knockdown (error bars represent standard deviation of 4 replicates). Unmodified ribose ("r") compared to 2'-deoxy ("d"), 2'-fluoro ("f") and 2'-methoxy ("m"). **(A)** ApoB (6981), **(B)** ApoB (9470), **(C)** ApoB (10127), **(D)** SSB (386), and **(E)** SSB (963) target sites evaluated. Single strands containing 2'F content exhibit the most pronounced mRNA knockdown of the various single strand modification patterns tested.

**Figure S2:** Comparison of purine (R) versus pyrimidine (Y) 2' modifications in the presence of 5' phosphorylation of the guide strand. In vitro cell-based evaluation of mRNA knockdown (error bars represent standard deviation of 4 replicates). Unmodified ribose ("r") compared to 2'-deoxy ("d"), 2'-fluoro ("f") and 2'-methoxy ("m"). **(A)** ApoB (6981), **(B)** ApoB (9470), **(C)** ApoB (10127), **(D)** SSB (386), and **(E)** SSB (963) target sites evaluated. Single strands containing 2'F content exhibit the most pronounced mRNA knockdown of the various single strand modification patterns tested.

**Figure S3:** Three abasic residues (3aba) at positions 1-3 of antisense strand decrease activity for both duplex and single strands. In vitro cell-based evaluation of mRNA knockdown (error bars represent standard deviation of 4 replicates). Unmodified ribose ("r") compared to 2'-deoxy ("d"), 2'-fluoro ("f") and 2'-methoxy ("m"). **(A)** ApoB (8786), **(B)** ApoB (6981), **(C)** ApoB (9470), **(D)** ApoB (10127), **(E)** SSB (386), and **(F)** SSB (963) target sites evaluated. All RNA oligos contain 5' phosphate (5'p).

Figure S1

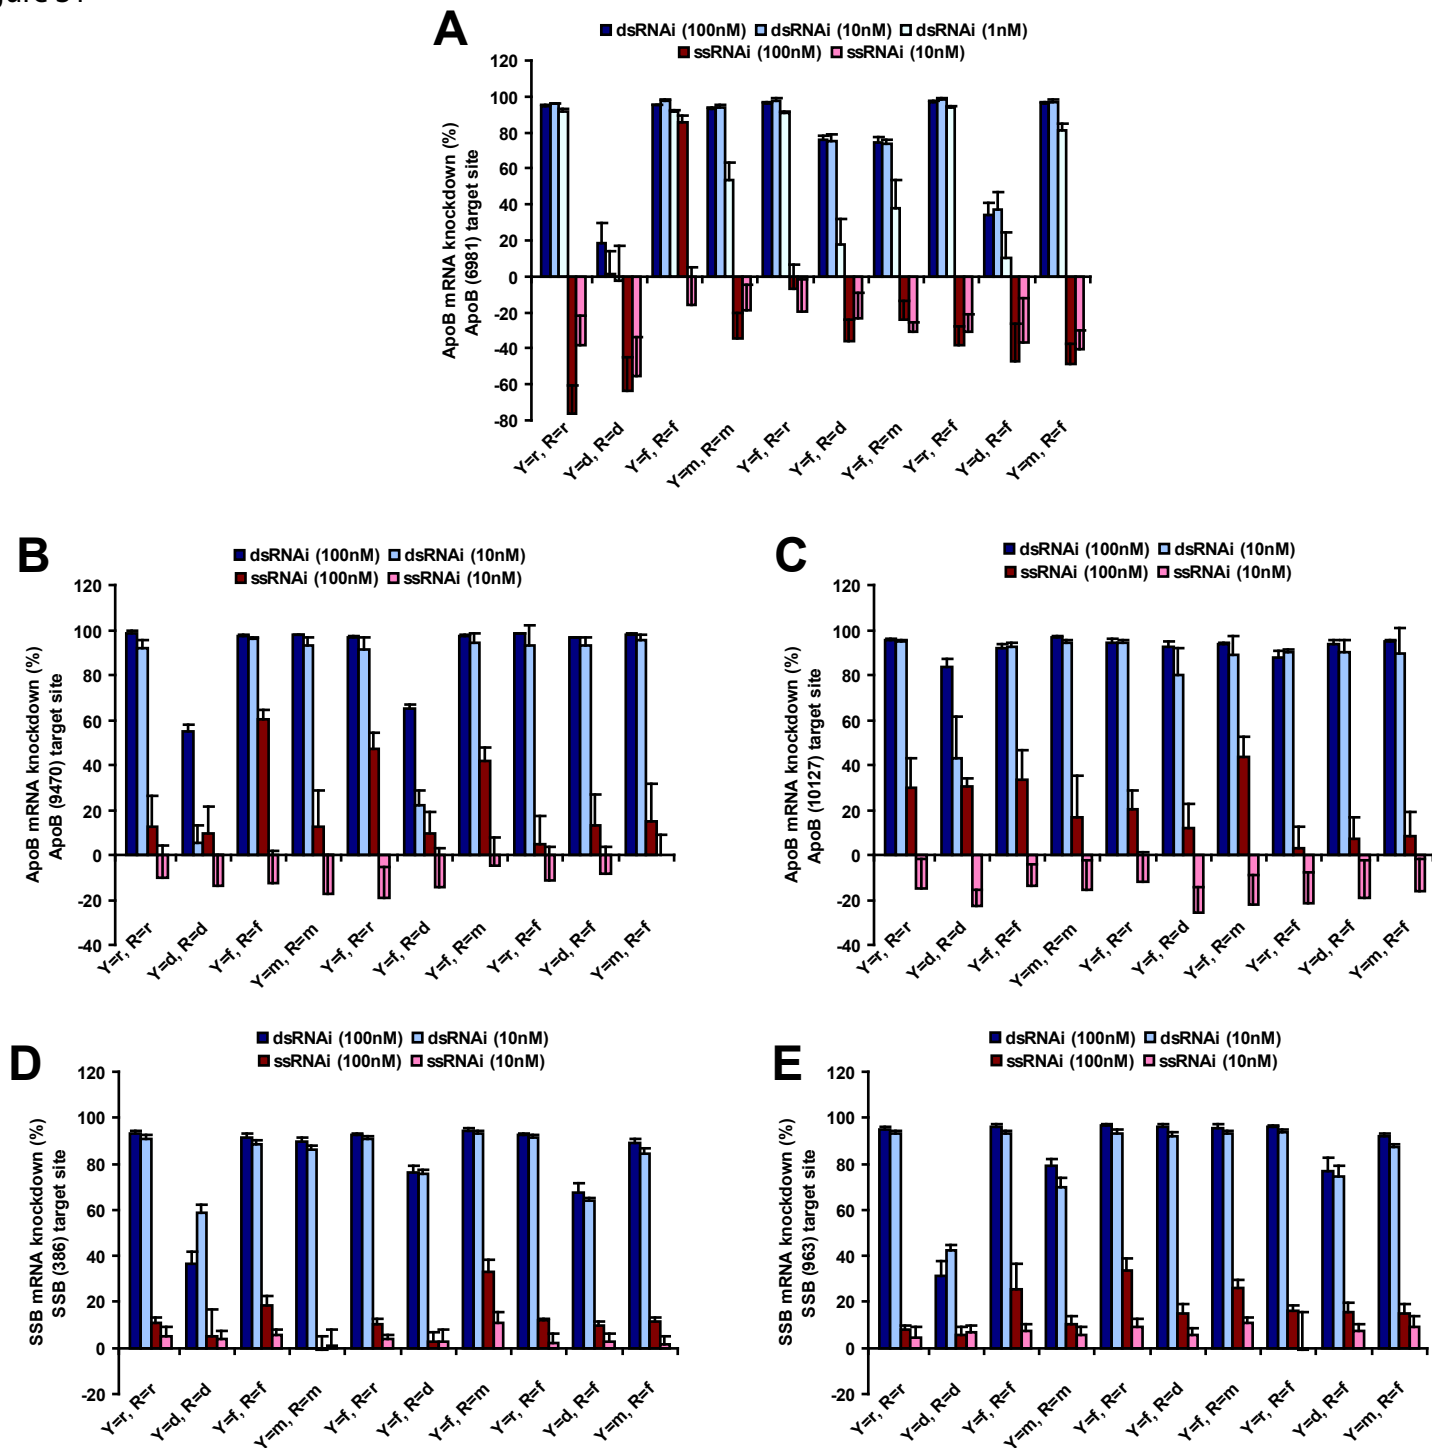

Figure S2

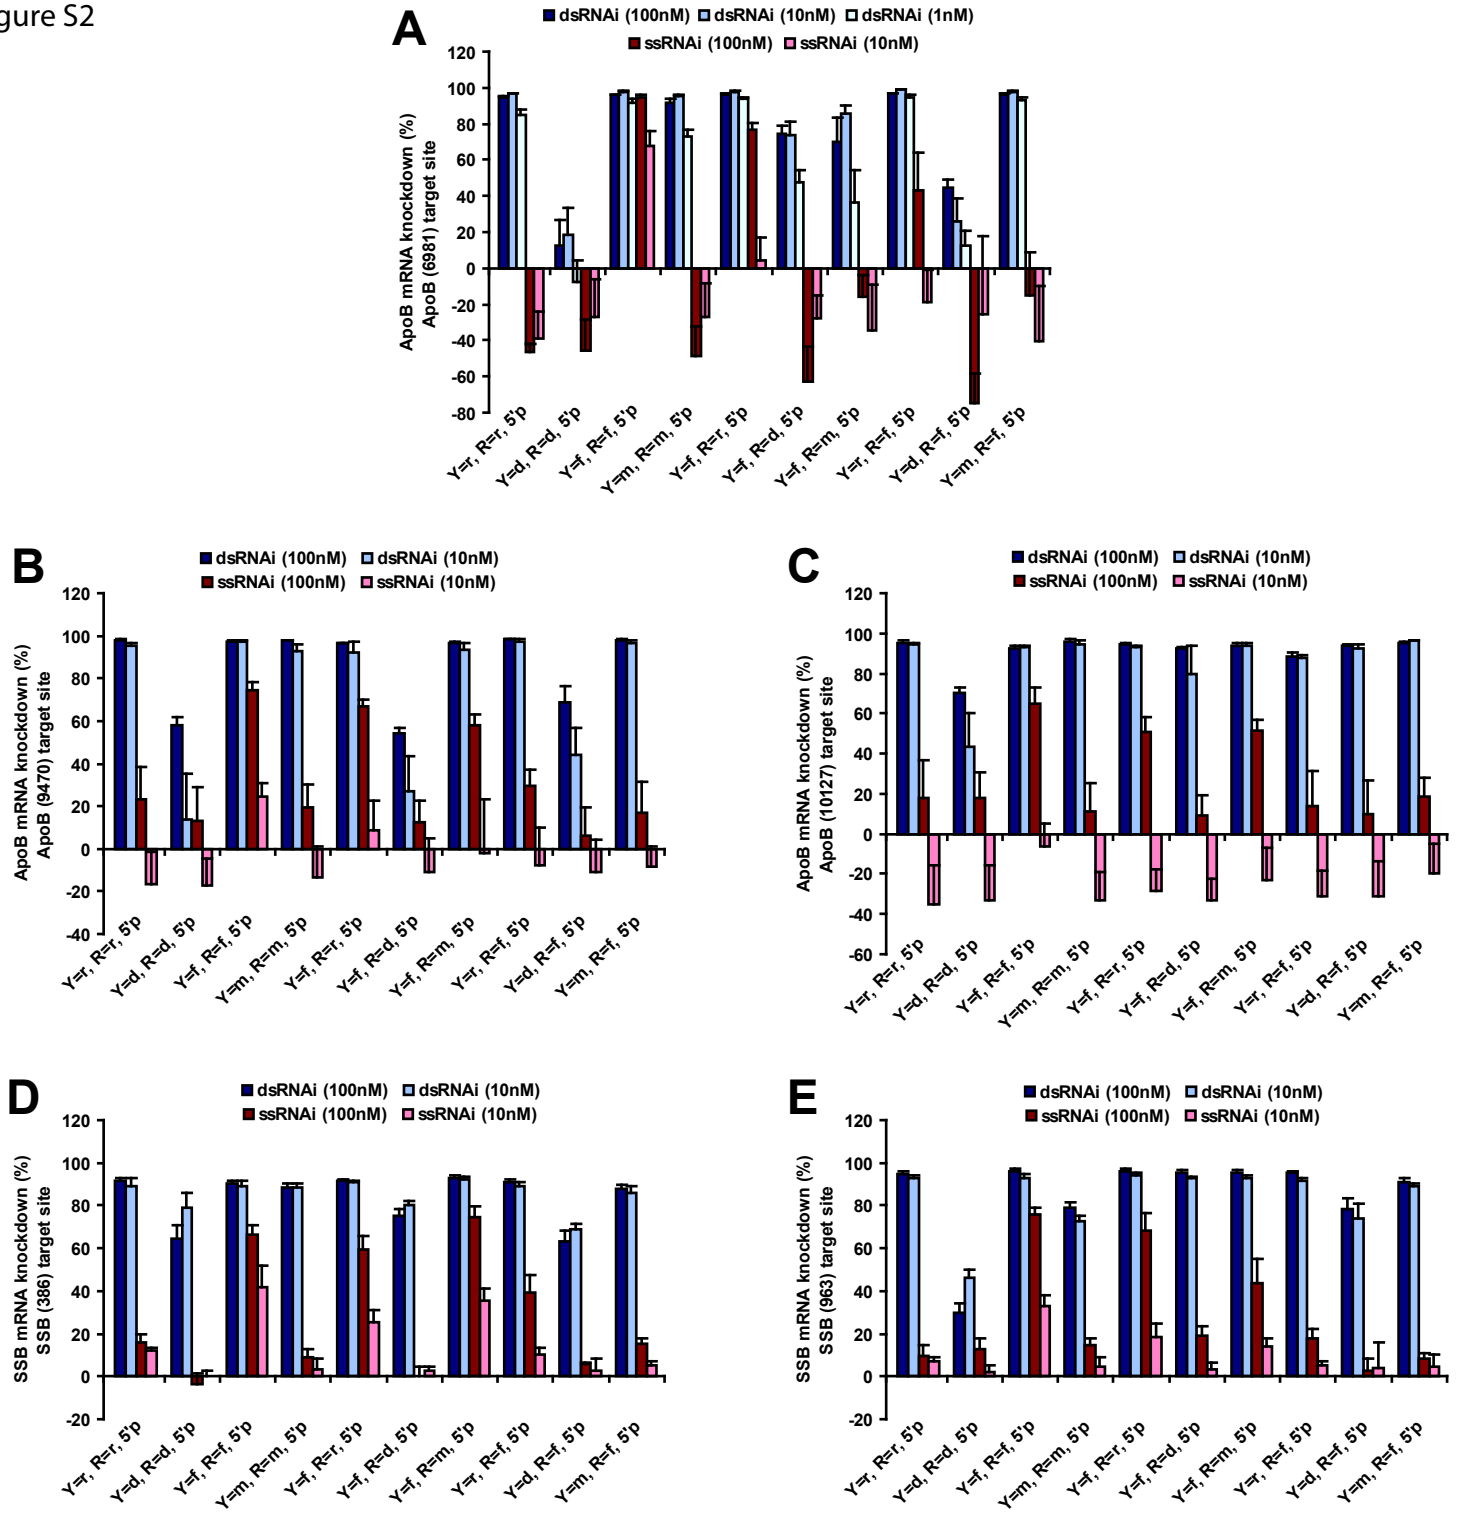

Figure S3

**A**

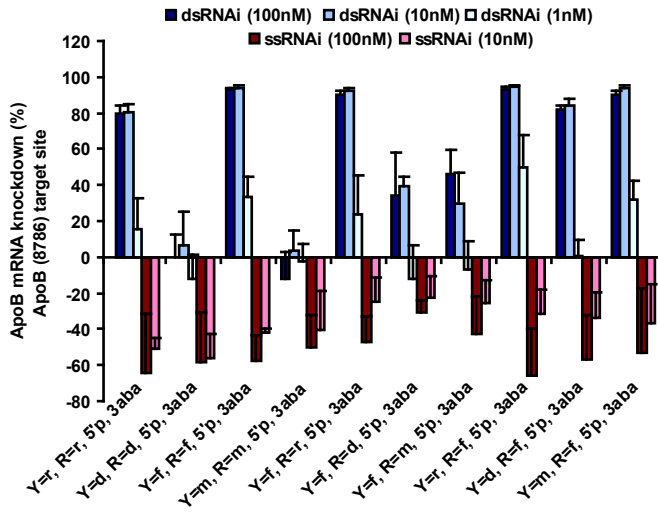

**B**

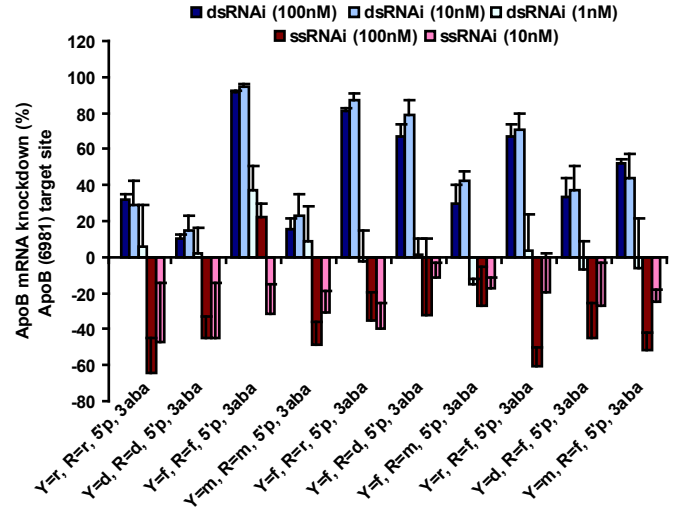

**C**

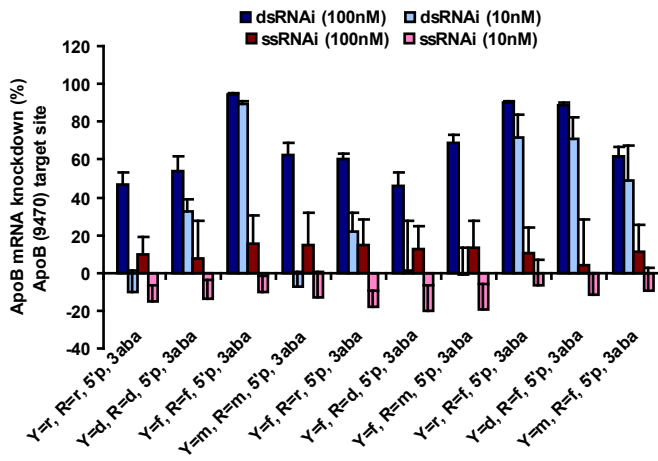

**D**

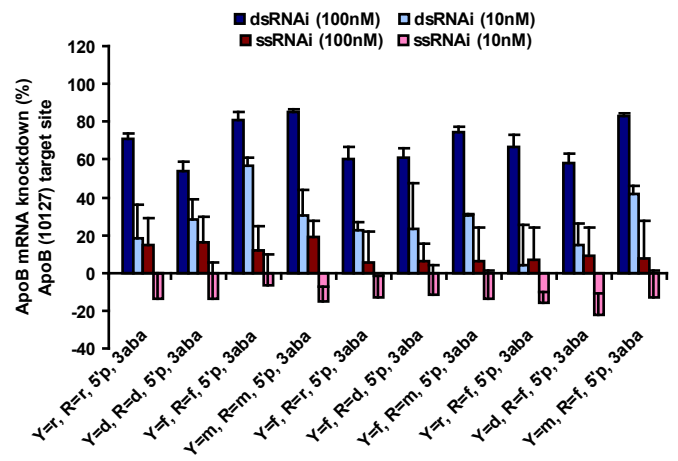

**E**

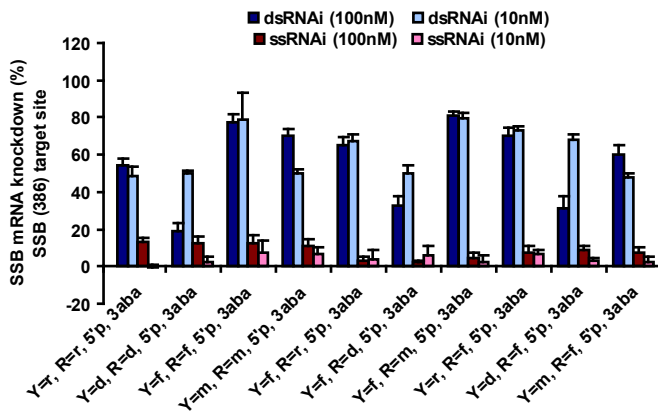

**F**

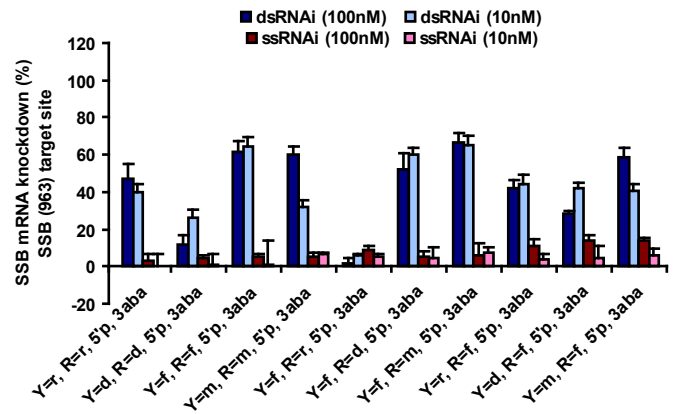

**Table S1:** In vitro potency and mRNA knockdown (at 10nM) measured in the Hepa1-6 mouse hepatocyte derived cell line. Cells transfected with RNAi Max.

| target     | mod type           | In Vitro Efficacy (24 hrs) |                        |             |
|------------|--------------------|----------------------------|------------------------|-------------|
|            |                    | EC50 (nM)                  | EC50 (R <sup>2</sup> ) | % KD (10nM) |
| ApoB(8786) | duplex (2'OH, 5'p) | 0.015                      | 0.992                  | 98          |
| ApoB(8786) | single (2'OH, 5'p) | na                         | na                     | 3           |
| ApoB(8786) | duplex (2'F, 5'p)  | 0.015                      | 0.999                  | 97          |
| ApoB(8786) | single (2'F, 5'p)  | 1.188                      | 0.990                  | 91          |
| ApoB(6981) | duplex (2'OH, 5'p) | 0.098                      | 0.992                  | 94          |
| ApoB(6981) | single (2'OH, 5'p) | na                         | na                     | 6           |
| ApoB(6981) | duplex (2'F, 5'p)  | 0.042                      | 0.997                  | 97          |
| ApoB(6981) | single (2'F, 5'p)  | 0.890                      | 0.988                  | 89          |

**Table S2:** In vivo knockdown measured in mouse livers. Percent knockdown, error (standard deviation), and number of mice per group (N) are shown.

| target      | mod type           | study   | dose | day 3  |         |   | day 2  |         |   | day 7  |         |   | day 14 |         |   | guide strand                                                     |
|-------------|--------------------|---------|------|--------|---------|---|--------|---------|---|--------|---------|---|--------|---------|---|------------------------------------------------------------------|
|             |                    |         |      | KD (%) | KD (SD) | N |                                                                  |
| ApoB (8786) | duplex (2'OH, 5'p) | study 1 | 3mpk | 97     | 1       | 5 |        |         |   |        |         |   |        |         |   | p;rU;rU;rA;rA;rG;rA;rG;rA;rA;rG;rC;rC;rU;rU;rA;rC;rU;rG;rG;mU;mU |
| ApoB (8786) | single (2'OH, 5'p) | study 1 | 3mpk | 14     | 4       | 5 |        |         |   |        |         |   |        |         |   | p;rU;rU;rA;rA;rG;rA;rG;rA;rA;rG;rC;rC;rU;rU;rA;rC;rU;rG;rG;mU;mU |
| ApoB (8786) | duplex (2'F, 5'p)  | study 1 | 3mpk | 98     | 1       | 5 |        |         |   |        |         |   |        |         |   | p;fU;fU;fA;fA;fG;fA;fG;fA;fA;fG;fC;fC;fU;fU;fA;fC;fU;fG;fG;mU;mU |
| ApoB (8786) | single (2'F, 5'p)  | study 1 | 3mpk | 74     | 6       | 5 |        |         |   |        |         |   |        |         |   | p;fU;fU;fA;fA;fG;fA;fG;fA;fA;fG;fC;fC;fU;fU;fA;fC;fU;fG;fG;mU;mU |
| ApoB (6981) | duplex (2'OH, 5'p) | study 1 | 3mpk | 85     | 5       | 5 |        |         |   |        |         |   |        |         |   | p;rU;rU;rG;rA;rU;rC;rU;rA;rA;rA;rU;rG;rC;rA;rU;rU;rG;rU;rG;mU;mU |
| ApoB (6981) | single (2'OH, 5'p) | study 1 | 3mpk | 6      | 12      | 5 |        |         |   |        |         |   |        |         |   | p;rU;rU;rG;rA;rU;rC;rU;rA;rA;rA;rU;rG;rC;rA;rU;rU;rG;rU;rG;mU;mU |
| ApoB (6981) | duplex (2'F, 5'p)  | study 1 | 3mpk | 97     | 0       | 5 |        |         |   |        |         |   |        |         |   | p;fU;fU;fG;fA;fU;fC;fU;fA;fA;fA;fU;fG;fC;fA;fU;fU;fG;fU;fG;mU;mU |
| ApoB (6981) | single (2'F, 5'p)  | study 1 | 3mpk | 61     | 6       | 5 |        |         |   |        |         |   |        |         |   | p;fU;fU;fG;fA;fU;fC;fU;fA;fA;fA;fU;fG;fC;fA;fU;fU;fG;fU;fG;mU;mU |
| ApoB (8786) | duplex (2'F, 5'p)  | study 2 | 6mpk |        |         |   | 98     | 1       | 5 | 97     | 0       | 5 | 95     | 1       | 5 | p;fU;fU;fA;fA;fG;fA;fG;fA;fA;fG;fC;fC;fU;fU;fA;fC;fU;fG;fG;mU;mU |
| ApoB (8786) | single (2'F, 5'p)  | study 2 | 6mpk |        |         |   | 91     | 1       | 5 | 77     | 4       | 5 | 34     | 14      | 5 | p;fU;fU;fA;fA;fG;fA;fG;fA;fA;fG;fC;fC;fU;fU;fA;fC;fU;fG;fG;mU;mU |
| ApoB (6981) | duplex (2'F, 5'p)  | study 2 | 6mpk |        |         |   | 97     | 1       | 5 | 97     | 1       | 5 | 95     | 1       | 5 | p;fU;fU;fG;fA;fU;fC;fU;fA;fA;fA;fU;fG;fC;fA;fU;fU;fG;fU;fG;mU;mU |
| ApoB (6981) | single (2'F, 5'p)  | study 2 | 6mpk |        |         |   | 84     | 8       | 3 | 71     | 3       | 3 | 19     | 4       | 4 | p;fU;fU;fG;fA;fU;fC;fU;fA;fA;fA;fU;fG;fC;fA;fU;fU;fG;fU;fG;mU;mU |









| siRNA ID   | guide strand                                                     | mod pattern         | ds        |             | ds       |            | ss         |              | ss        |             |             |               |
|------------|------------------------------------------------------------------|---------------------|-----------|-------------|----------|------------|------------|--------------|-----------|-------------|-------------|---------------|
|            |                                                                  |                     | 100nM %KD | 100nM STDEV | 10nM %KD | 10nM STDEV | ds 1nM %KD | ds 1nM STDEV | 100nM %KD | 100nM STDEV | ss 10nM %KD | ss 10nM STDEV |
| SSB963-108 | p;dT;dT;dT;fA;dT;dT;dC;fA;dC;dC;fA;dT;fG;fA;dT;dT;mU;mU          | Y=d, R=f, 5'p       | 78.67     | 4.68        | 73.80    | 7.24       |            |              | 2.75      | 5.67        | 3.88        | 12.33         |
| SSB963-109 | p;mU;mU;mU;mU;fA;mU;mU;mU;mC;fA;mC;mC;fA;rU;fG;fA;mU;mU;mU;mU    | Y=m, R=f, 5'p       | 91.11     | 2.07        | 89.08    | 1.47       |            |              | 8.13      | 2.87        | 4.69        | 5.65          |
| SSB963-110 | rU;rU;rU;rA;rU;rU;rC;rA;rC;rA;rU;rG;rA;rU;rU;mU;mU               | Y=r, R=r            | 95.16     | 0.69        | 93.16    | 0.95       |            |              | 7.91      | 1.95        | 4.44        | 4.51          |
| SSB963-111 | dT;dT;dT;dA;dT;dT;dC;dA;dC;dC;dA;dT;dG;dA;dT;dT;mU;mU            | Y=d, R=d            | 31.27     | 6.55        | 42.39    | 2.50       |            |              | 5.85      | 3.18        | 6.61        | 3.42          |
| SSB963-112 | fU;fU;fU;fA;fU;fU;fU;fC;fA;fC;fC;fA;fU;fG;fA;fU;fU;mU;mU         | Y=f, R=f            | 95.96     | 1.02        | 93.42    | 0.98       |            |              | 25.26     | 11.11       | 7.26        | 3.25          |
| SSB963-113 | mU;mU;mU;mA;mU;mU;mU;mC;mA;mC;mC;mA;rU;mG;mA;mU;mU;mU;mU         | Y=m, R=m            | 79.33     | 2.98        | 69.90    | 3.97       |            |              | 10.47     | 3.23        | 5.38        | 4.06          |
| SSB963-114 | fU;fU;fU;rA;fU;fU;fC;rA;fC;fC;rA;rG;rA;fU;fU;mU;mU               | Y=f, R=r            | 96.51     | 0.94        | 93.43    | 1.43       |            |              | 33.75     | 5.20        | 9.15        | 3.51          |
| SSB963-115 | fU;fU;fU;dA;fU;fU;fC;dA;fC;fC;dA;fU;dG;dA;fU;fU;mU;mU            | Y=f, R=d            | 95.96     | 1.10        | 92.24    | 1.55       |            |              | 15.19     | 4.00        | 5.84        | 2.86          |
| SSB963-116 | fU;fU;fU;mA;fU;fU;fC;mA;fC;fC;mA;fU;mG;mA;fU;fU;mU;mU            | Y=f, R=m            | 95.72     | 1.60        | 93.28    | 1.30       |            |              | 25.87     | 3.96        | 11.19       | 2.26          |
| SSB963-117 | rU;rU;rU;rA;rU;rU;rC;rA;rC;rA;rU;fG;fA;rU;rU;mU;mU               | Y=r, R=f            | 96.07     | 0.70        | 93.72    | 0.96       |            |              | 15.91     | 2.41        | -1.03       | 16.33         |
| SSB963-118 | dT;dT;dT;fA;dT;dT;dC;fA;dC;dC;fA;dT;fG;fA;dT;dT;mU;mU            | Y=d, R=f            | 76.93     | 5.75        | 74.70    | 4.25       |            |              | 15.86     | 4.08        | 7.44        | 3.18          |
| SSB963-119 | mU;mU;mU;fA;mU;mU;mU;mC;fA;mC;mC;fA;rU;fG;fA;mU;mU;mU;mU         | Y=m, R=f            | 91.78     | 1.47        | 87.07    | 1.46       |            |              | 15.27     | 3.77        | 8.93        | 4.73          |
| SSB963-120 | p;aba;aba;aba;rU;rA;rU;rU;rC;rA;rC;rA;rU;rG;rA;rU;rU;mU;mU       | Y=r, R=r, 5'p, 3aba | 47.26     | 7.81        | 39.80    | 4.23       |            |              | 3.20      | 3.40        | 0.20        | 6.28          |
| SSB963-121 | p;aba;aba;aba;dT;dA;dT;dT;dC;dA;dC;dC;dA;dT;dG;dA;dT;dT;mU;mU    | Y=d, R=d, 5'p, 3aba | 12.07     | 4.88        | 26.16    | 4.08       |            |              | 4.58      | 1.26        | 1.02        | 5.50          |
| SSB963-122 | p;aba;aba;aba;fU;fA;fU;fU;fC;fA;fC;fA;fU;fG;fA;fU;fU;mU;mU       | Y=f, R=f, 5'p, 3aba | 61.82     | 5.24        | 64.71    | 5.07       |            |              | 5.21      | 1.85        | 0.83        | 12.77         |
| SSB963-123 | p;aba;aba;aba;mU;mA;mU;mU;mC;mA;mC;mC;mA;rU;mG;mA;mU;mU;mU;mU    | Y=m, R=m, 5'p, 3aba | 60.06     | 4.16        | 32.24    | 2.99       |            |              | 5.38      | 2.30        | 6.61        | 0.92          |
| SSB963-124 | p;aba;aba;aba;fU;rA;fU;fU;fC;rA;fC;fC;rA;fU;rG;rA;fU;fU;mU;mU    | Y=f, R=r, 5'p, 3aba | 1.88      | 2.87        | 5.72     | 1.27       |            |              | 8.64      | 2.57        | 5.17        | 1.84          |
| SSB963-125 | p;aba;aba;aba;fU;dA;fU;fU;fC;dA;fC;fC;dA;fU;dG;dA;fU;fU;mU;mU    | Y=f, R=d, 5'p, 3aba | 52.10     | 8.61        | 60.40    | 3.50       |            |              | 5.24      | 2.74        | 4.37        | 6.01          |
| SSB963-126 | p;aba;aba;aba;fU;mA;fU;fU;fC;mA;fC;fC;mA;fU;mG;mA;fU;fU;mU;mU    | Y=f, R=m, 5'p, 3aba | 66.52     | 4.83        | 65.16    | 5.04       |            |              | 5.88      | 6.29        | 7.54        | 2.60          |
| SSB963-127 | p;aba;aba;aba;rU;fA;rU;rU;rC;rA;rC;rA;rU;fG;fA;rU;rU;mU;mU       | Y=r, R=f, 5'p, 3aba | 41.97     | 4.22        | 44.11    | 5.05       |            |              | 11.16     | 3.66        | 4.05        | 2.74          |
| SSB963-128 | p;aba;aba;aba;dT;fA;dT;dT;dC;fA;dC;dC;fA;dT;fG;fA;dT;dT;mU;mU    | Y=d, R=f, 5'p, 3aba | 28.25     | 1.56        | 42.17    | 2.76       |            |              | 13.97     | 3.04        | 4.85        | 5.91          |
| SSB963-129 | p;aba;aba;aba;mU;fA;mU;mU;mU;mC;fA;mC;mC;fA;rU;fG;fA;mU;mU;mU;mU | Y=m, R=f, 5'p, 3aba | 58.65     | 4.84        | 40.77    | 3.28       |            |              | 13.96     | 1.31        | 5.99        | 3.43          |

**Table S4:** Passenger strands used in this study.

| siRNA ID  | passenger strand                                                     |
|-----------|----------------------------------------------------------------------|
| APOB8786  | iB;rC;rC;rA;rG;rU;rA;rA;rG;rG;rC;rU;rU;rC;rU;rC;rU;rU;rA;rA;mU;mU;iB |
| APOB6981  | iB;rC;rA;rC;rA;rA;rU;rG;rC;rA;rU;rU;rU;rA;rG;rA;rU;rC;rA;rA;mU;mU;iB |
| APOB10127 | iB;rU;rC;rA;rU;rC;rA;rC;rA;rC;rU;rG;rA;rA;rU;rA;rC;rC;rA;rA;mU;mU;iB |
| APOB9470  | iB;rC;rU;rU;rU;rA;rA;rC;rA;rA;rU;rU;rC;rC;rU;rG;rA;rA;rA;rU;mU;mU;iB |
| SSB386    | iB;rA;rC;rA;rA;rC;rA;rG;rA;rC;rU;rU;rU;rA;rA;rU;rG;rU;rA;rA;mU;mU;iB |
| SSB963    | iB;rA;rA;rA;rU;rC;rA;rU;rG;rG;rU;rG;rA;rA;rA;rU;rA;rA;rA;rA;mU;mU;iB |

**Table S5:** DNA primers used for 5'RACE (see Figure 6).

| name                  | sequence                            | amplicon size* | ApoB site** |
|-----------------------|-------------------------------------|----------------|-------------|
| rev1                  | GGCATTGTGCTCACCGATCATTCTGCCTT       | 358            | 9153        |
| rev1n                 | GAGCAGTGCCCGACCATTGGCTGTT           | 319            | 9114        |
| rev2                  | CTCCGTGTAAGGCAAGTTAATTTTCAGGAATTGTT | 712            | 9507        |
| rev2n                 | CCAGGTTGGCATCTCCATTCATTCCTATA       | 659            | 9454        |
| GeneRacer5'           | CGACTGGAGCACGAGGACACTGA             |                |             |
| GeneRacer5'<br>Nested | GGACACTGACATGGACTGAAGGAGTA          |                |             |

\* amplicon size calculated based on predicted cleavage site of ApoB (8786) siRNA

\*\* site relative to NM009693
